# Supplementary material for: Oxidation of 1,2-propanediol to methyl lactate over hydroxyapatite-supported Au–Cu catalysts with varying Ca/P ratios
Source: Royal Society of Chemistry journal article supplement (doi:10.1039/d4cy01559b), 2025-01-01
Supplement: d4cy01559b1.pdf [file d4cy01559b1.pdf]

## Electronic Supplementary Information

*for*

### **Oxidation of 1, 2-propanediol to methyl lactate over hydroxyapatite-supported Au-Cu catalysts with varying Ca/P ratios**

Junying Tian <sup>a</sup>, Yingying Fan <sup>a</sup>, Tao Wei <sup>a</sup>, Qingxia Guo <sup>a</sup>, Weiguo Fang <sup>a</sup>, Yuanyuan Cong <sup>a</sup>,

Dongqiang Zhang <sup>a</sup>, Yongle Guo <sup>a,\*</sup>

<sup>a</sup> School of Petrochemical Technology, Lanzhou University of Technology, Lanzhou 730050, Gansu, China

<sup>b</sup> Lanzhou Jinchuan Precious Metal Materials Co., Ltd. Lanzhou 730100, Gansu, China

\* Corresponding author · E-mail: [ylguo@lut.edu.cn](mailto:ylguo@lut.edu.cn)

## CAPTIONS

- Fig.S1** (a) N<sub>2</sub> adsorption–desorption isotherms of supports. (the Y values of different curves were displayed with different offset) (b) Barrett–Joyner–Halenda pore size distribution curves of supports with different Ca/P ratios. (c) N<sub>2</sub> adsorption–desorption isotherms of catalysts. (the Y values of different curves were displayed with different offset) (d) Barrett-Joyner-Halenda pore size distribution curves for catalysts with different support Ca/P ratios.....S3
- Fig.S2** The particle size results after Au-Cu/HAP-2 used.....S4

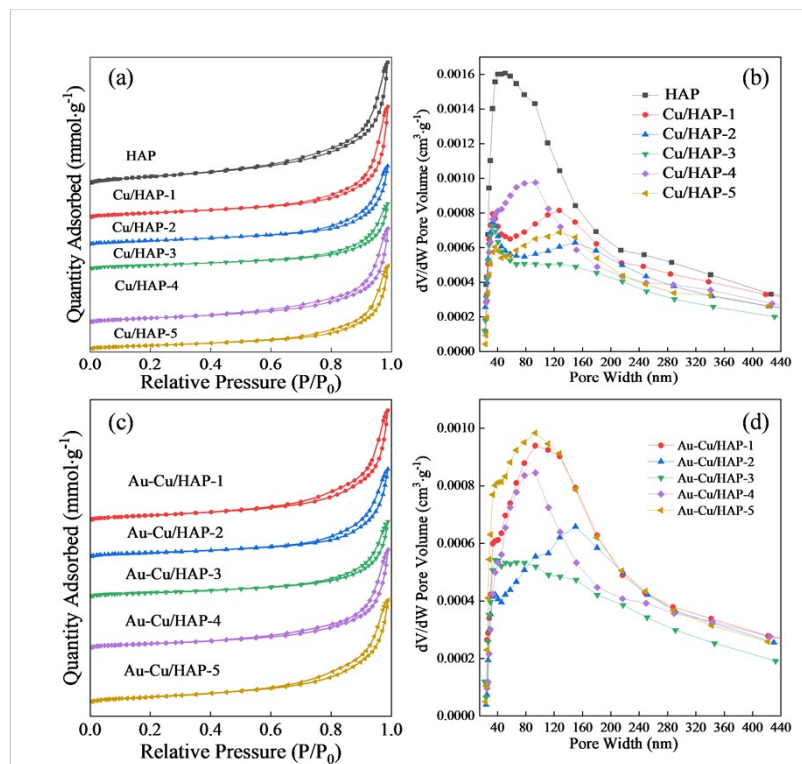

Fig. S1 (a) N<sub>2</sub> adsorption–desorption isotherms of supports. (the Y values of different curves were displayed with different offset) (b) Barrett–Joyner–Halenda pore size distribution curves of supports with different Ca/P ratios. (c) N<sub>2</sub> adsorption–desorption isotherms of catalysts. (the Y values of different curves were displayed with different offset) (d) Barrett–Joyner–Halenda pore size distribution curves for catalysts with different support Ca/P ratios.

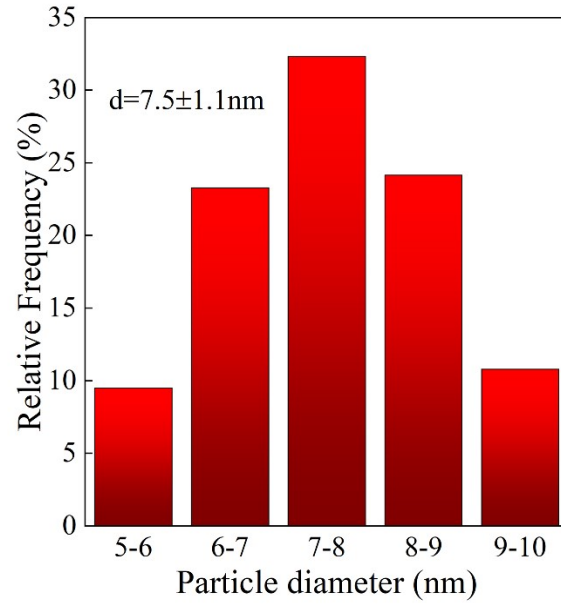

Fig. S2 The particle size results after Au-Cu/HAP-2 used
